# Supplementary material for: A Multifunctional Aggregation-Induced Emission Luminogen with pH-Response Detachable Connector for Lipid Droplet-Specific Imaging and Tracing
Source: MDPI journal article supplement (doi:10.3390/molecules28207029), 2023-10-11
Supplement: s1 [file s1]

## Supporting Information

# **A Multifunctional Aggregation-Induced Emission Luminogen with pH-Response Detachable Connector for Lipid Droplet-Specific Imaging and Tracing**

Yanjie Li 1, Rui Fan 2, Pengfei Gao 1,3,4,\* and Chang-Hua Hu 1,4,\*

1 College of Pharmaceutical Sciences, Southwest University, Chongqing 400715, China;  
lyj1989@swu.edu.cn

2 Southwest University Hospital, Southwest University, Chongqing 400715, China;  
fanrui01@swu.edu.cn

3 Key Laboratory of Luminescence Analysis and Molecular Sensing (Southwest University),  
Ministry of Education, Southwest University, Chongqing 400715, China

4 NMPA Key Laboratory for Quality Monitoring of Narcotic Drugs and Psychotropic  
Substance, Chongqing 401121, China

\* Correspondence: gpf1987@swu.edu.cn (P.G.); chhhu@swu.edu.cn (C.-H.H.)

**Supporting figures.**

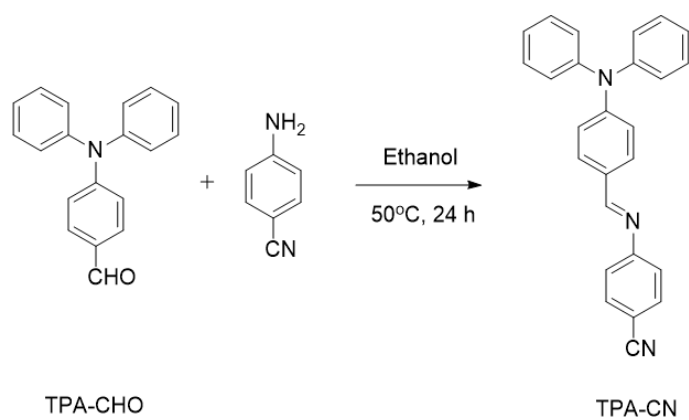

**Figure S1** The synthesis route of Triphenylamine-benzonitrile Schiff base (TPA-CN) molecule.

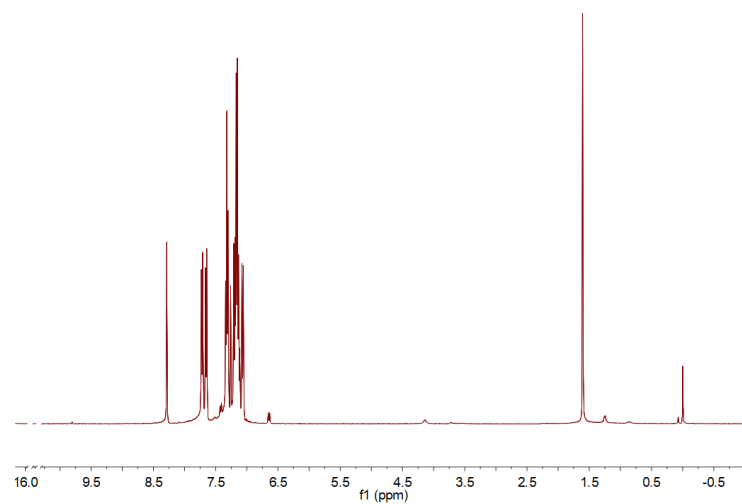

**Figure S2** <sup>1</sup>H-NMR spectra of the TPA-CN.

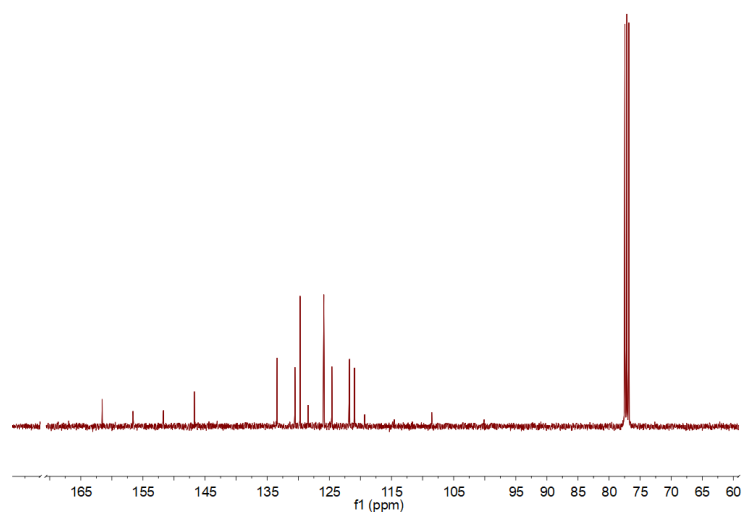

**Figure S3** <sup>13</sup>C-NMR spectra of the TPA-CN.

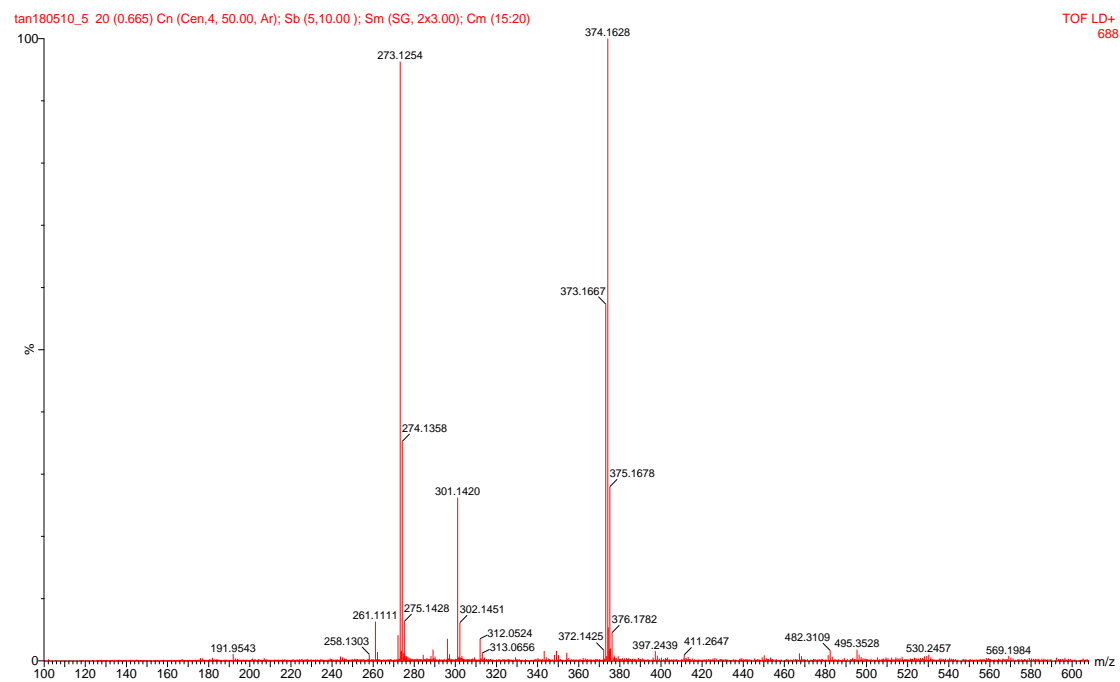

**Figure S4** High resolution Mass spectra of the TPA-CN.

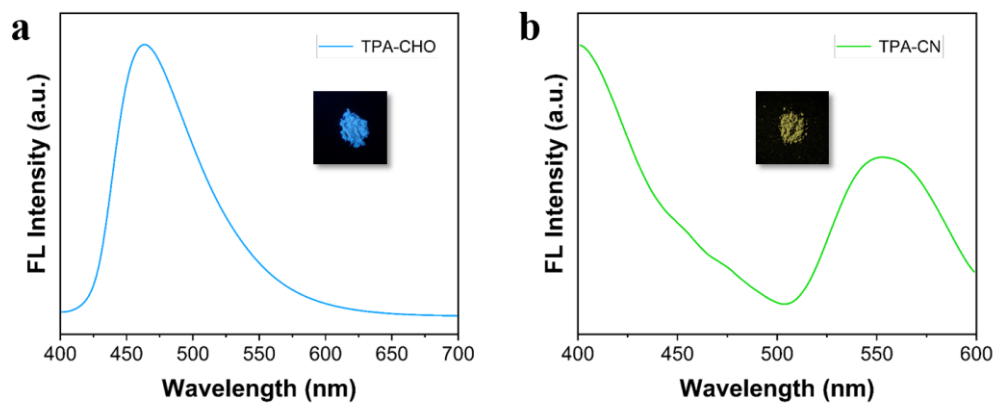

**Figure S5** The fluorescence spectra of (a) TPA-CHO ( $\lambda_{\text{ex}} = 365$  nm) and (b) TPA-CN ( $\lambda_{\text{ex}} = 330$  nm). The inset graph was captured under UV irradiation of 365 nm.

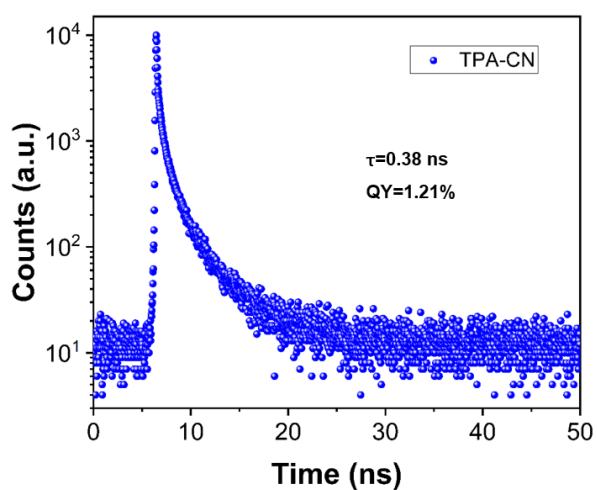

**Figure S6** Fluorescence decay curves of the TPA-CN ( $\lambda_{\text{em}} = 550$  nm).

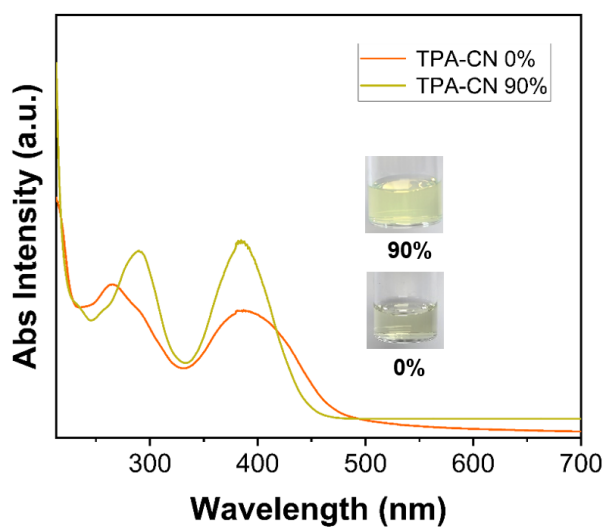

**Figure S7** Absorption spectra of the TPA-CN ( $1 \times 10^{-4}$  M) in pure ethanol and in 90% ethanol/water solution.

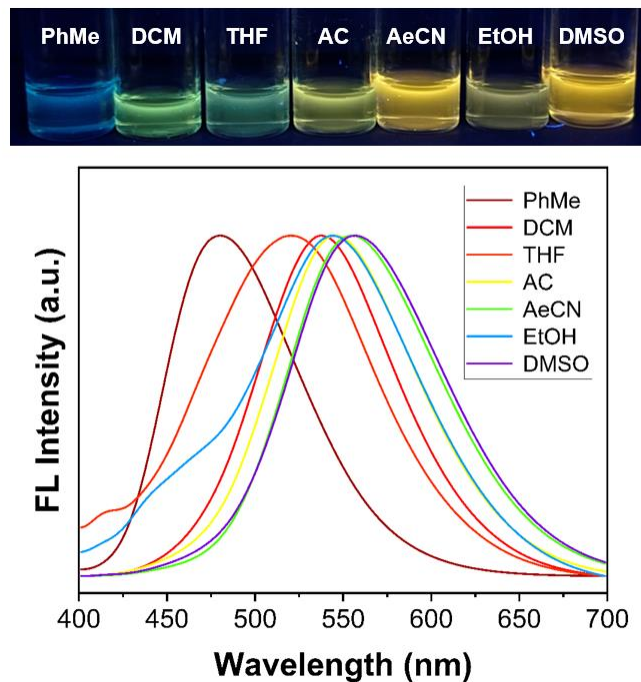

**Figure S8** Fluorescence images and spectra of TPA-CN ( $1 \times 10^{-4}$  M) in different solvents, including the toluene (PhMe), dichloromethane (DCM), tetrahydrofuran (THF), acetone (AC), acetonitrile (AeCN), ethanol (EtOH), dimethyl sulfoxide (DMSO),  $\lambda_{\text{ex}} = 365$  nm.

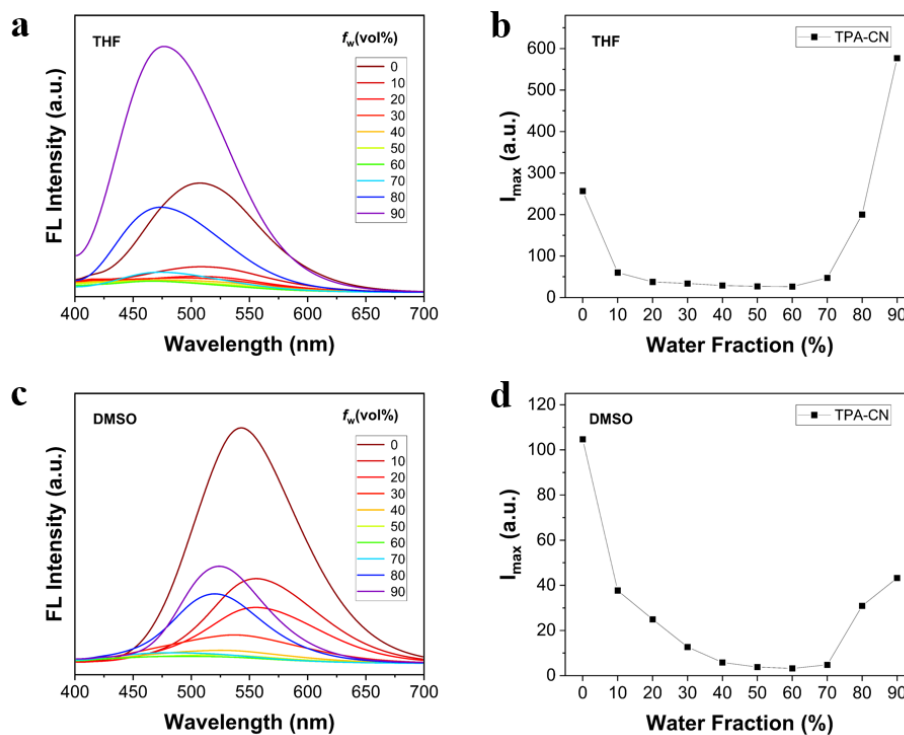

**Figure S9** Fluorescence spectra (a, c) and AIE curves (b, d) of TPA-CN in THF/water and DMSO/water mixtures with different water fractions.

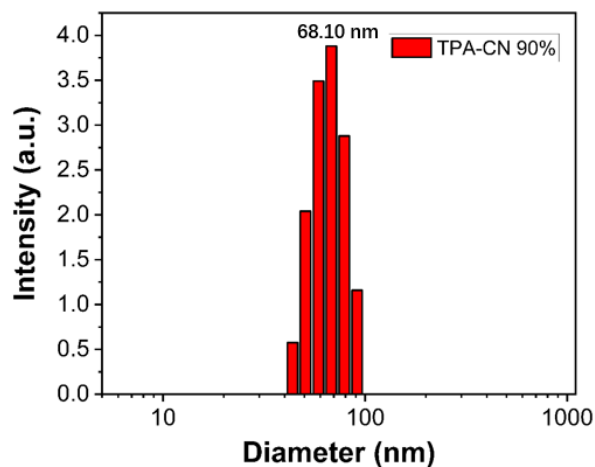

**Figure S10** Size distribution profiles for the TPA-CN ( $1 \times 10^{-4}$  M) in the 90% EtOH/water solutions determined by the DLS.

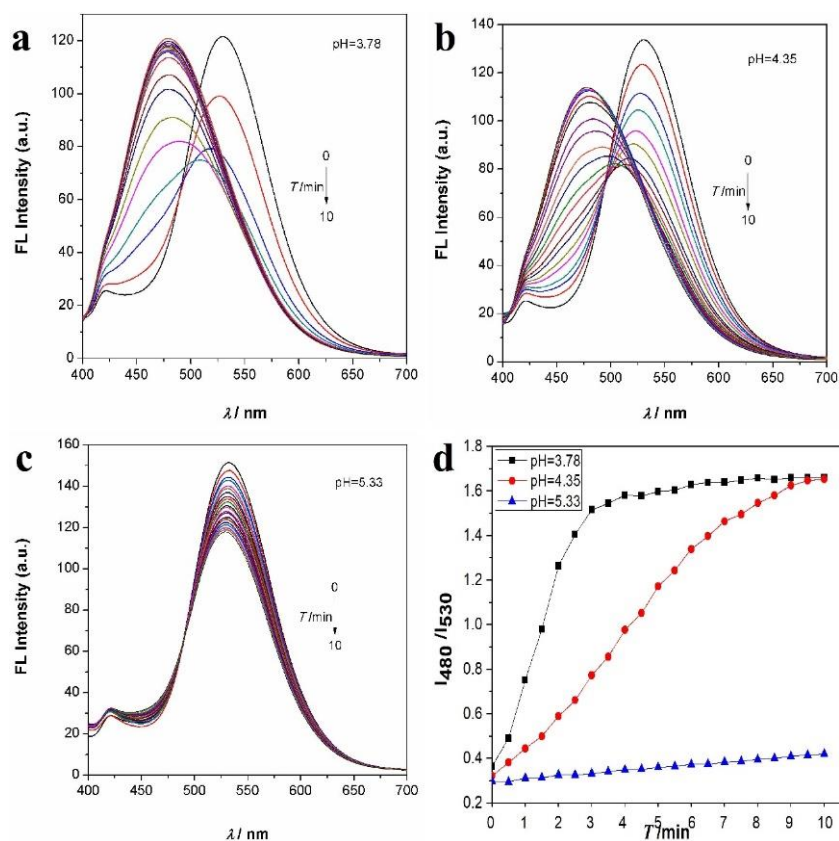

**Figure S11** Photoluminescence (PL) spectra of TPA-CN in different pH BR buffers within 10 min. (a) pH response of TPA-CN to pH 3.29 BR buffers within 10 min. (b) pH response of TPA-CN to pH 4.35 BR buffers within 10 min. (c) pH response of TPA-CN to pH 5.33 BR buffers within 10 min. (d) Fluorescence ratios of TPA-CN within pH 3.29, 4.35 and 5.33 BR buffers within 10 min.

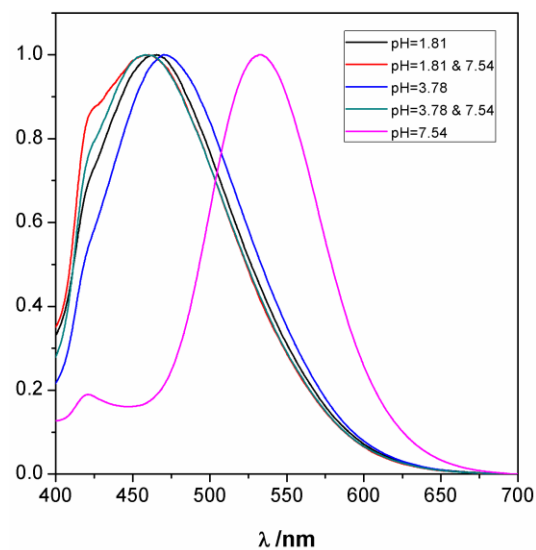

**Figure S12** Investigation of the reversibility of the spectra response of TPA-CN to pH 1.81 and 3.78 BR buffers.

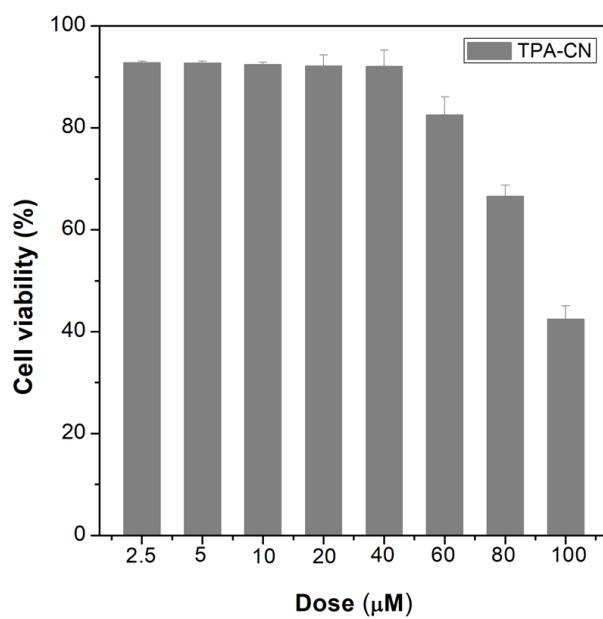

**Figure S13** The cytotoxicity of TPA-CN on HeLa cells. The concentration of TPA-CN was 2.5, 5, 10, 20, 40, 60, 80, 100  $\mu\text{M}$ , and the time is 24 h.

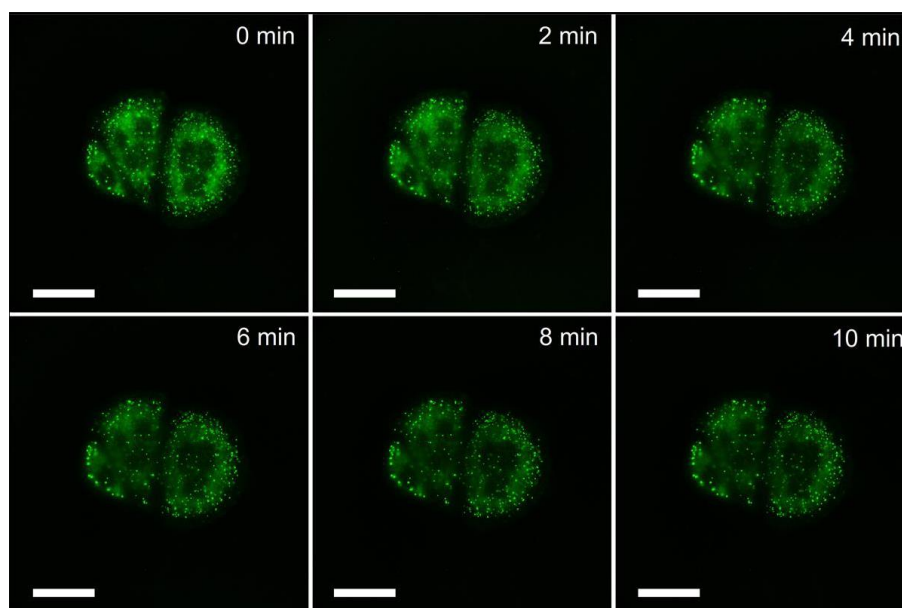

**Figure S14** The original color of the contrastive analysis of LDs location and dynamic monitoring images of TPA-CN (20  $\mu$ M) on HeLa cells in 10 minutes.
